# Supplementary material for: Passive transfer of Ad26.COV2.S-elicited IgG from humans attenuates SARS-CoV-2 disease in hamsters
Source: PubMed Central journal article supplement (PMC8748674; doi:10.1038/s41541-021-00427-z), 2022-01-10
Supplement: 41541_2021_427_MOESM1_ESM.pdf [file 41541_2021_427_MOESM1_ESM.pdf]

## Supplementary Information

### Passive transfer of Ad26.COV2.S-elicited IgG from humans attenuates SARS-CoV-2 disease in hamsters

Lisa H. Tostanoski<sup>1</sup>, Abishek Chandrashekar<sup>1</sup>, Shivani Patel<sup>1</sup>, Jingyou Yu<sup>1</sup>, Catherine Jacob-Dolan<sup>1,2</sup>, Aiquan Chang<sup>1,2</sup>, Olivia C. Powers<sup>1</sup>, Daniel Sellers<sup>1</sup>, Sarah Gardner<sup>1</sup>, Julia Barrett<sup>1</sup>, Owen Sanborn<sup>1</sup>, Kathryn E. Stephenson<sup>1</sup>, Jessica L. Ansel<sup>1</sup>, Kate Jaegle<sup>1</sup>, Michael S. Seaman<sup>1</sup>, Maciel Porto<sup>3</sup>, Megan Lok<sup>3</sup>, Brittany Spence<sup>3</sup>, Kathleen Cayer<sup>3</sup>, Danielle Nase<sup>3</sup>, Shaikim Holman<sup>3</sup>, Heath Bradette<sup>3</sup>, Swagata Kar<sup>3</sup>, Hanne Andersen<sup>3</sup>, Mark G. Lewis<sup>3</sup>, Freek Cox<sup>4</sup>, Jeroen T. B. M. Tolboom<sup>4</sup>, Anne Marit de Groot<sup>4</sup>, Dirk Heerwegh<sup>5</sup>, Mathieu Le Gars<sup>4</sup>, Jerald Sadoff<sup>4</sup>, Frank Wegmann<sup>4</sup>, Roland C. Zahn<sup>4</sup>, Hanneke Schuitemaker<sup>4</sup>, Dan H. Barouch<sup>1,2,6,7\*</sup>

<sup>1</sup>Center for Virology and Vaccine Research, Beth Israel Deaconess Medical Center, Harvard Medical School; Boston, MA, USA.

<sup>2</sup>Harvard Medical School; Boston, MA, USA.

<sup>3</sup>BIOQUAL, Inc.; Rockville, MD, USA.

<sup>4</sup>Janssen Vaccines & Prevention, Leiden, The Netherlands.

<sup>5</sup>Janssen Research & Development, Beerse, Belgium

<sup>6</sup>Ragon Institute of MGH, MIT and Harvard; Cambridge, MA, USA.

<sup>7</sup>Massachusetts Consortium on Pathogen Readiness, Boston, MA, USA.

\*Corresponding author. Email: [dbarouch@bidmc.harvard.edu](mailto:dbarouch@bidmc.harvard.edu)

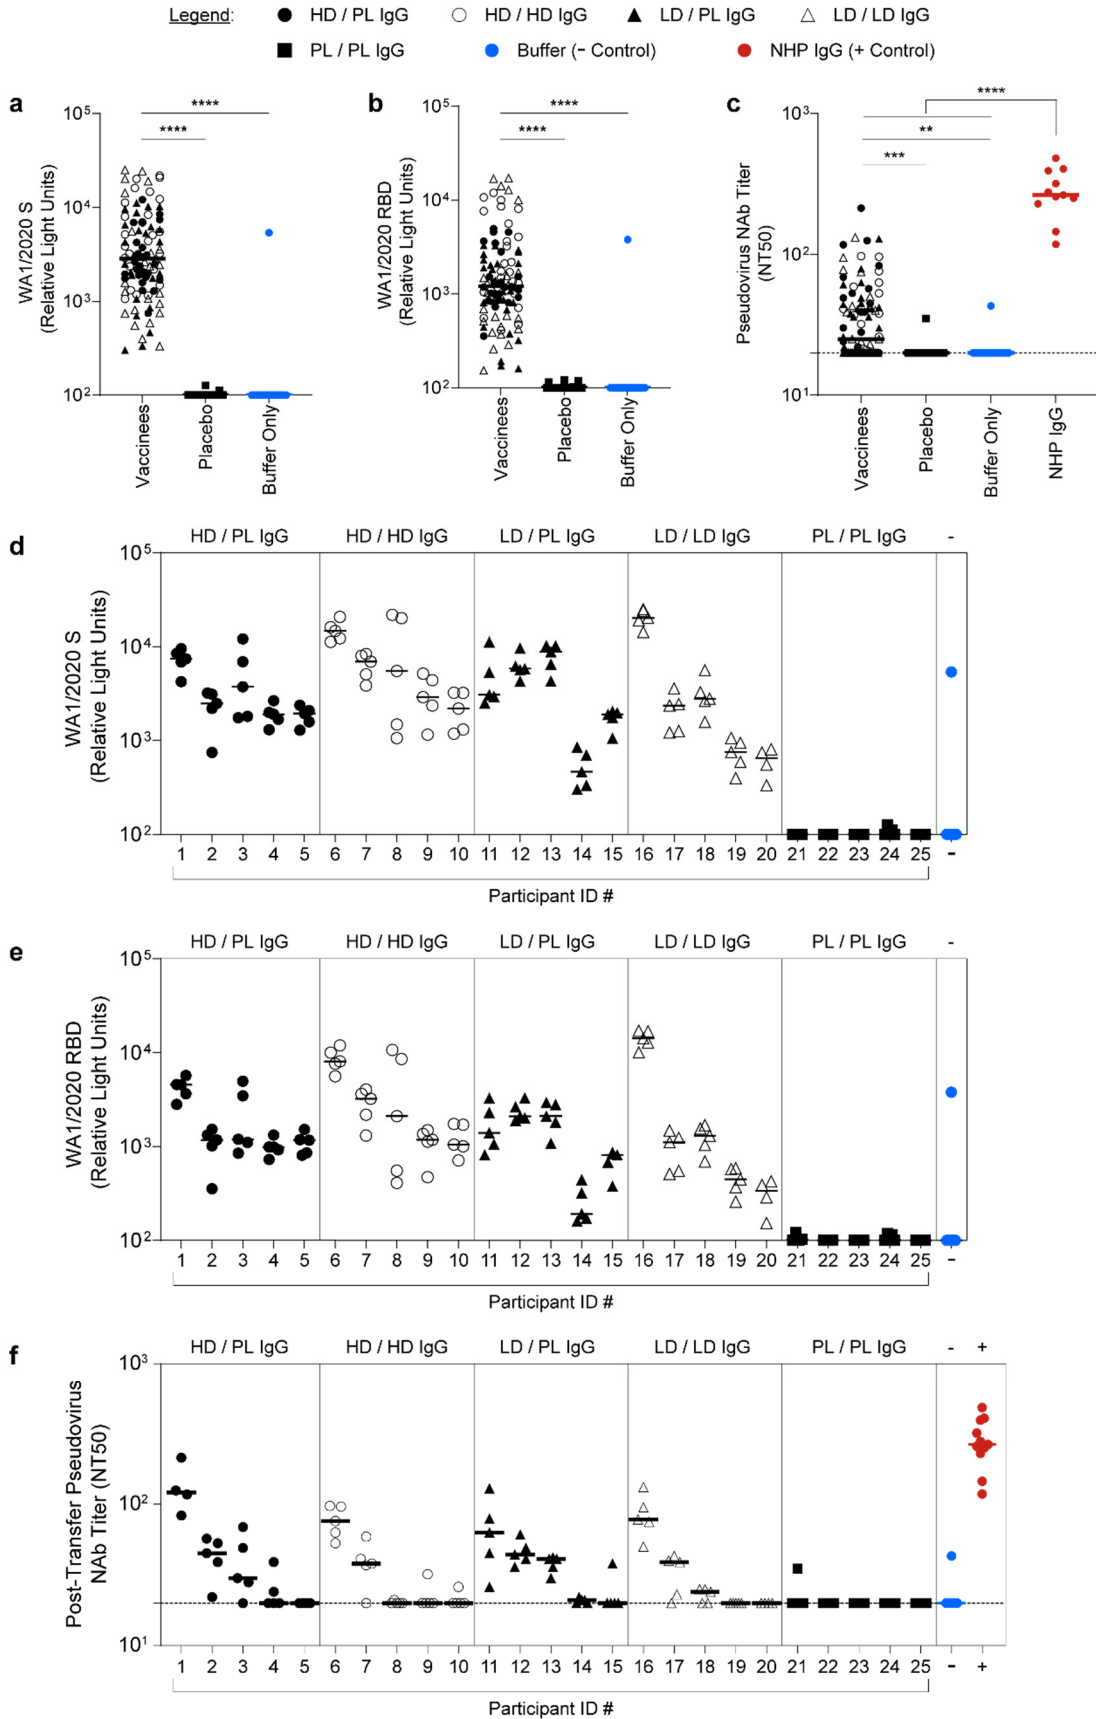

**Supplementary Figure 1.** Purified IgG from vaccine or placebo recipients was transferred to naïve hamsters via intraperitoneal injection and one-day post-transfer, serum was analyzed for **a)** WA1/2020 SARS-CoV-2 spike (S) binding, **b)** WA1/2020 SARS-CoV-2 receptor binding domain (RBD) binding, or **c)** WA1/2020 pseudovirus neutralization titers. Additional control groups included hamsters that received buffer alone and hamsters that received an equivalent dose (i.e., 25 mg) of IgG purified from convalescent non-human primates (NHPs). Data displayed in a-b were generated via electrochemiluminescence assays (ECLA) using an anti-human detection antibody, thus the NHP IgG recipient group was excluded from the analyses. In panels a-c, data points displayed correspond to the value of each individual recipient hamsters and horizontal lines indicate group medians. Statistics displayed are the results of Kruskal-Wallis tests with Dunn's multiple comparisons test. (\*\* =  $P \leq 0.01$ ; \*\*\* =  $P \leq 0.001$ ; \*\*\*\* =  $P \leq 0.0001$ ). Similarly, in panels **d-f)** the binding and neutralizing antibody titers of individual hamsters are displayed, separated into groups corresponding to the N=20 study participants who received the Ad26.COV2.S vaccine, the N=5 participants who received a placebo immunization, or the control hamsters that received either buffer alone or convalescent NHP IgG. Within each dosing regimen, participants were ordered and assigned a number 1-25 by magnitude of response for visualization purposes. As above, in panels d-e, the NHP IgG recipient group was excluded from ECLA analyses due to the human-specific detection antibody. Horizontal lines in panels d-f indicate the group medians.

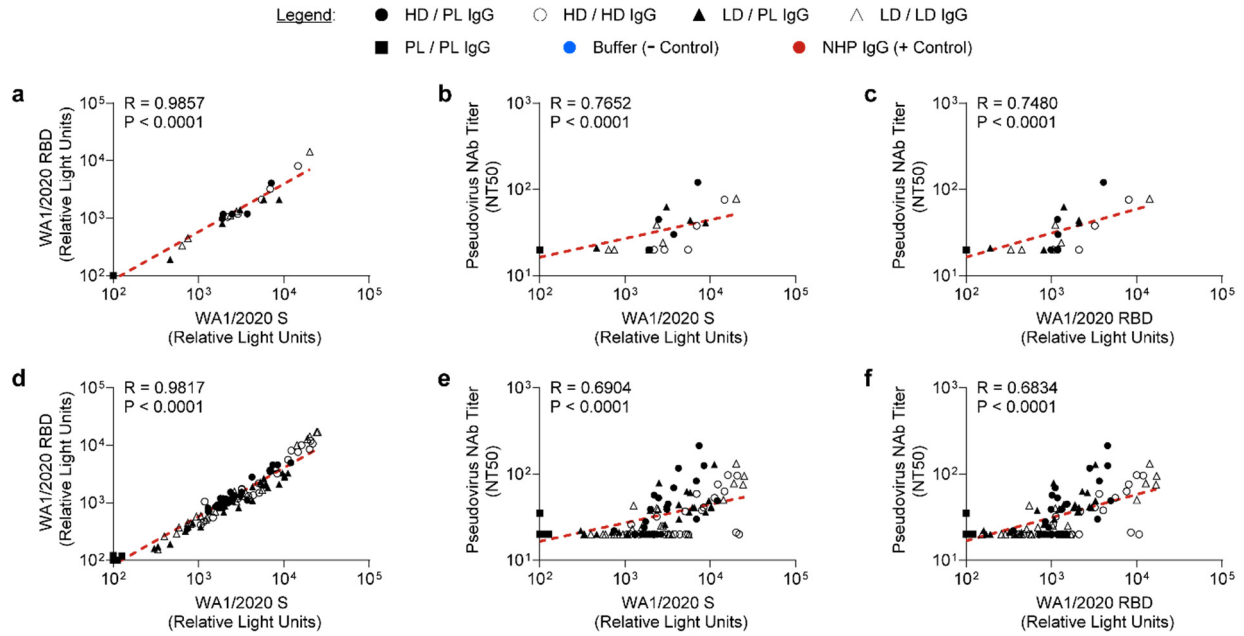

**Supplementary Figure 2. Post-transfer binding and neutralizing antibody activity correlation analyses.** Purified IgG from vaccine or placebo recipients was transferred to naïve hamsters via intraperitoneal injection and one-day post-transfer, serum was analyzed for **a)** WA1/2020 SARS-CoV-2 spike (S) binding, **b)** WA1/2020 SARS-CoV-2 receptor binding domain (RBD) binding, or **c)** WA1/2020 pseudovirus neutralization titers. Correlation analyses between these three assays were completed for the a-c) median values for each group of hamsters corresponding to one study participant and d-f) each individual hamster as a single data point. Statistics in all panels indicate the results of Spearman correlation analyses.

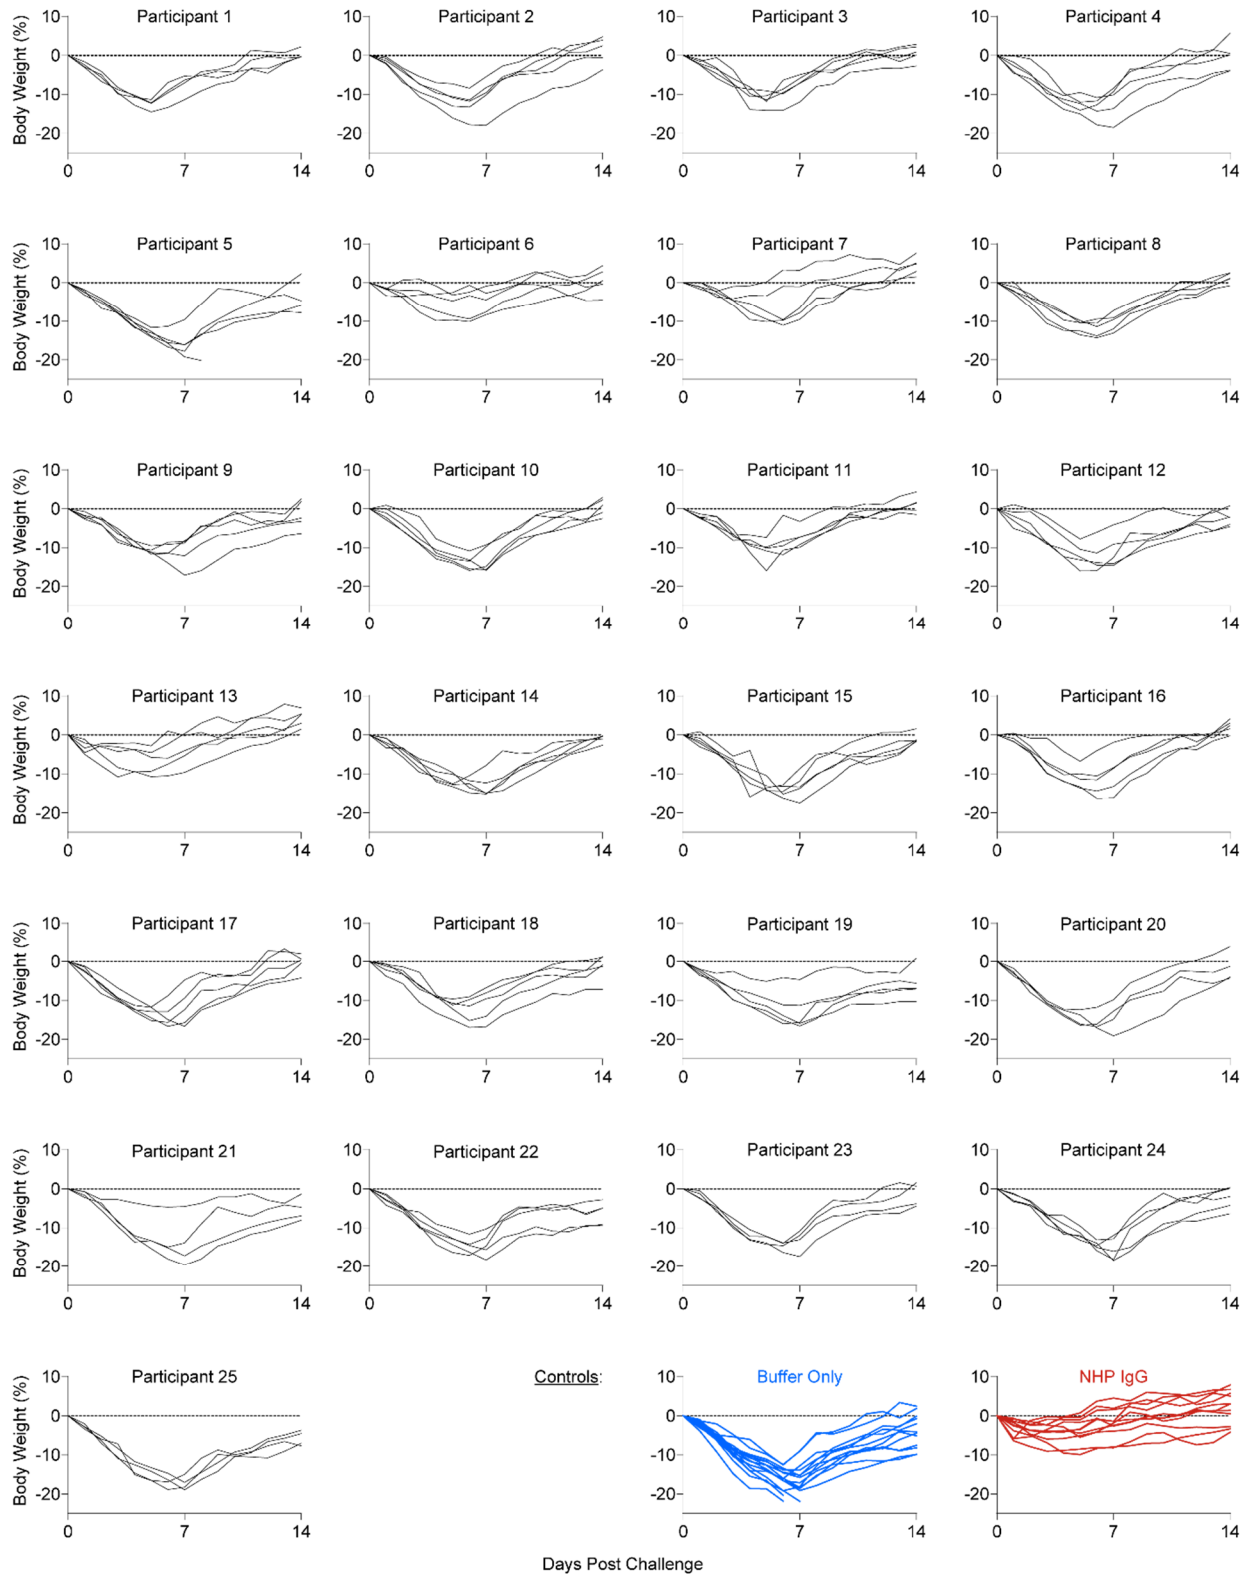

**Supplementary Figure 3.** One day post-IgG transfer, groups of hamsters were challenged with SARS-CoV-2 via the intranasal route. Post-challenge, hamsters were monitored for fourteen days for signs of clinical disease. Data shown represent the individual weight traces of each hamster in the groups corresponding to the study participants (N=25), as well as the negative control (buffer only) and positive control (NHP IgG) groups. Study participants received the following dosing regimens, as described in Table 1: i) Participants 1-5: HD/PL, Participants 6-10: HD/HD, Participants 11-15: LD/PL, Participants 16-20: LD/LD, and Participants 21-25: PL/PL. Incomplete body weight traces represent animals that exhibited greater than 20% body weight loss, a humane endpoint euthanasia criteria.

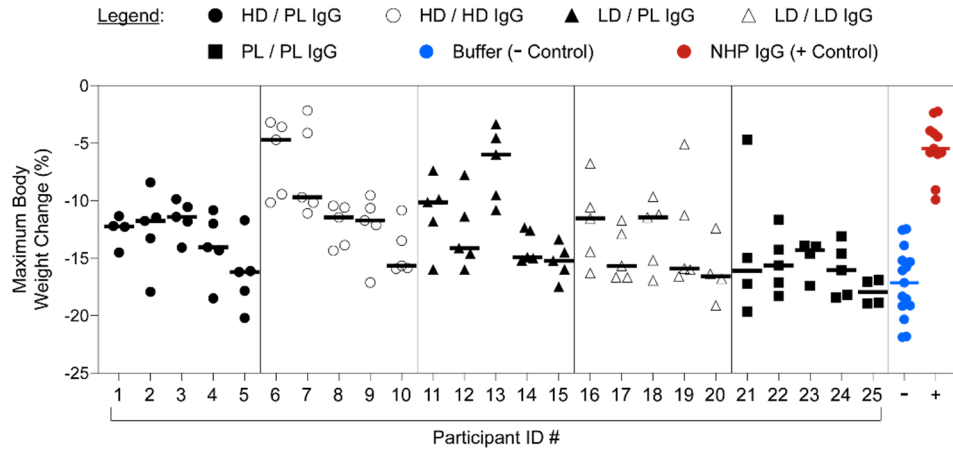

**Supplementary Figure 4.** Data displayed correspond to the median maximum body weight change, similar to the data displayed in Fig 2c-d. In these Supplementary, maximum body weight change is shown for each individual hamster in the groups corresponding to the study participants or the control groups, as indicated

**Supplementary Table 1.** Study overview of the Ad26.COV2.S dosing regimens tested in cohort

1b.

| <b>Group</b> | <b>N</b> | <b>Day 1</b>                        | <b>Day 57</b>                       | <b>Code</b> |
|--------------|----------|-------------------------------------|-------------------------------------|-------------|
| 1            | 5        | 1 x 10 <sup>11</sup> VP Ad26.COV2.S | Placebo                             | HD / PL     |
| 2            | 5        | 1 x 10 <sup>11</sup> VP Ad26.COV2.S | 1 x 10 <sup>11</sup> VP Ad26.COV2.S | HD / HD     |
| 3            | 5        | 5 x 10 <sup>10</sup> VP Ad26.COV2.S | Placebo                             | LD / PL     |
| 4            | 5        | 5 x 10 <sup>10</sup> VP Ad26.COV2.S | 5 x 10 <sup>10</sup> VP Ad26.COV2.S | LD / LD     |
| 5            | 5        | Placebo                             | Placebo                             | PL / PL     |
